# Supplementary material
Source: HighWire-hosted journal article supplement (https://bmjopen.bmj.com/content/7/4/e012879)
Supplement: inline-supplementary-material-1 [file inline-supplementary-material-1.pdf]

## Trial registration (2b)

| <b>Data Information</b>                       | <b>category</b>                                                                                                                                                                                                                                                                                                                                                                                                                                                                                                                                                                                                                                                                                                                                                                                                                                                                          |
|-----------------------------------------------|------------------------------------------------------------------------------------------------------------------------------------------------------------------------------------------------------------------------------------------------------------------------------------------------------------------------------------------------------------------------------------------------------------------------------------------------------------------------------------------------------------------------------------------------------------------------------------------------------------------------------------------------------------------------------------------------------------------------------------------------------------------------------------------------------------------------------------------------------------------------------------------|
| Primary registry and trial identifying number | Clinical Trials.gov: NCT02769572                                                                                                                                                                                                                                                                                                                                                                                                                                                                                                                                                                                                                                                                                                                                                                                                                                                         |
| Date of registration in primary registry      | 10 May, 2016                                                                                                                                                                                                                                                                                                                                                                                                                                                                                                                                                                                                                                                                                                                                                                                                                                                                             |
| Secondary identifying numbers                 | /                                                                                                                                                                                                                                                                                                                                                                                                                                                                                                                                                                                                                                                                                                                                                                                                                                                                                        |
| Source(s) of monetary of material support     | Ministry of Science and Technology of the Peoples' Republic of China                                                                                                                                                                                                                                                                                                                                                                                                                                                                                                                                                                                                                                                                                                                                                                                                                     |
| Primary sponsor                               | Ministry of Science and Technology of the Peoples' Republic of China                                                                                                                                                                                                                                                                                                                                                                                                                                                                                                                                                                                                                                                                                                                                                                                                                     |
| Secondary sponsor                             | Sichuan Provincial Department of Education                                                                                                                                                                                                                                                                                                                                                                                                                                                                                                                                                                                                                                                                                                                                                                                                                                               |
| Contact for public queries                    | Dr. Tang<br>E-mail: <a href="mailto:tangyong@cdutcm.edu.cn">tangyong@cdutcm.edu.cn</a>                                                                                                                                                                                                                                                                                                                                                                                                                                                                                                                                                                                                                                                                                                                                                                                                   |
| Contact for scientific queries                | Dr. Tang Chengdu University of Traditional Chinese Medicine Chengdu, Sichuan, China                                                                                                                                                                                                                                                                                                                                                                                                                                                                                                                                                                                                                                                                                                                                                                                                      |
| Public title                                  | Moxibustion in Osteoarthritis of the Knee                                                                                                                                                                                                                                                                                                                                                                                                                                                                                                                                                                                                                                                                                                                                                                                                                                                |
| Scientific title                              | Moxibustion versus diclofenac sodium gel in treatment of knee osteoarthritis: A study protocol for a double-blinded, double-dummy, randomized controlled trial                                                                                                                                                                                                                                                                                                                                                                                                                                                                                                                                                                                                                                                                                                                           |
| Countries of recruitment                      | China                                                                                                                                                                                                                                                                                                                                                                                                                                                                                                                                                                                                                                                                                                                                                                                                                                                                                    |
| Health condition(s) or problem(s) studied     | Knee osteoarthritis                                                                                                                                                                                                                                                                                                                                                                                                                                                                                                                                                                                                                                                                                                                                                                                                                                                                      |
| Intervention(s)                               | Moxibustion group: treatment plus placebo gel;<br>Control group: diclofenac sodium gel plus placebo moxibustion                                                                                                                                                                                                                                                                                                                                                                                                                                                                                                                                                                                                                                                                                                                                                                          |
| Key inclusion and exclusion criteria          | Inclusion criteria: (1) male or female, aged between 40 and 75 years, with knee osteoarthritis diagnosed according to American College of Rheumatology criteria; <sup>5</sup> (2) radiological confirmation of osteoarthritis in one or both knees (Kellgren-Lawrence score 2 or 3); (3) had knee pain of longer than 3 months' duration; (4) the average severity of knee pain at least 3 points on a 10-point of VAS; (5) willingness to be randomly assigned and comply with our study protocol; (6) agreement to sign the consent form.<br>Exclusion criteria: (1) pain in the knee may be caused by inflammatory, malignant, autoimmune disease or traumatic injury; (2) serious diseases including cancer, uncontrolled hypertension, diabetes mellitus requiring insulin injection; life-threatening cardiovascular or neurological events; chronic respiratory disease; bleeding |

|                          |                                                                                                                                                                                                                                                                                                                                                                                                                                                                                                             |
|--------------------------|-------------------------------------------------------------------------------------------------------------------------------------------------------------------------------------------------------------------------------------------------------------------------------------------------------------------------------------------------------------------------------------------------------------------------------------------------------------------------------------------------------------|
|                          | disorders; clinically-active renal, hepatic or peptic ulcer diseases and serious mental diseases; (3) knee replacement surgery, arthroscopy of the affected knee within the past year, steroid or hyaluronic acid injection in the knee joints within the previous 3 months; (4) physiotherapy including acupuncture, cupping for knee pain during the previous 4 weeks; (5) previous experience with moxibustion treatment; (6) pregnant and lactating women; (7) participating in another clinical trial. |
| Study type               | Interventional                                                                                                                                                                                                                                                                                                                                                                                                                                                                                              |
|                          | Allocation: randomized; Intervention model: parallel assignment; Masking: double blind; Study Classification: safety/efficacy;                                                                                                                                                                                                                                                                                                                                                                              |
|                          | Primary purpose: treatment                                                                                                                                                                                                                                                                                                                                                                                                                                                                                  |
|                          | Phase III                                                                                                                                                                                                                                                                                                                                                                                                                                                                                                   |
| Date of first enrollment | 24, May, 2015                                                                                                                                                                                                                                                                                                                                                                                                                                                                                               |
| Target sample size       | 144                                                                                                                                                                                                                                                                                                                                                                                                                                                                                                         |
| Recruitment status       | Recruiting                                                                                                                                                                                                                                                                                                                                                                                                                                                                                                  |
| Primary outcome(s)       | The mean change in the global scale value of the Western Ontario and McMaster Universities Osteoarthritis Index (WOMAC) from baseline to 4 weeks.                                                                                                                                                                                                                                                                                                                                                           |
| Key secondary outcomes   | The secondary outcomes include the mean changes in the WOMAC subscales (pain, stiffness, and function) at 2, 4, 8 and 12 weeks from baseline.                                                                                                                                                                                                                                                                                                                                                               |
